# Supplementary material for: Food selection and feeding patterns in nectarivorous bats: Leptonycteris yerbabuenae and Glossophaga soricina
Source: PeerJ journal article supplement (doi:10.7717/peerj.20164), 2025-10-24
Supplement: Dataset_MHSH2024.zip [file DB_MHSH_et.al. 2024.xlsx]

## Sheet: DB_MHSH_et.al. 2024
ID_bats	bat_species	Solution	hour	visit_mean	Total_visit	bat_weight
1	LEPTO	water	8	0	0	27.1
1	LEPTO	water	9	0	0	27.1
1	LEPTO	water	10	1	2	27.1
1	LEPTO	water	11	0	0	27.1
1	LEPTO	water	12	0	0	27.1
1	LEPTO	water	1	0	0	27.1
1	LEPTO	water	2	0	0	27.1
1	LEPTO	water	3	0	0	27.1
1	LEPTO	water	4	0	0	27.1
1	LEPTO	water	5	0	0	27.1
1	LEPTO	water	6	0	0	27.1
1	LEPTO	water	7	0	0	27.1
4	LEPTO	water	8	0	0	26.8
4	LEPTO	water	9	0	0	26.8
4	LEPTO	water	10	0	0	26.8
4	LEPTO	water	11	0	0	26.8
4	LEPTO	water	12	0	0	26.8
4	LEPTO	water	1	0	0	26.8
4	LEPTO	water	2	0	0	26.8
4	LEPTO	water	3	0	0	26.8
4	LEPTO	water	4	0	0	26.8
4	LEPTO	water	5	0	0	26.8
4	LEPTO	water	6	0	0	26.8
4	LEPTO	water	7	0	0	26.8
5	LEPTO	water	8	0	0	27.8
5	LEPTO	water	9	1	2	27.8
5	LEPTO	water	10	0	0	27.8
5	LEPTO	water	11	1.5	3	27.8
5	LEPTO	water	12	0	0	27.8
5	LEPTO	water	1	0	0	27.8
5	LEPTO	water	2	0	0	27.8
5	LEPTO	water	3	0	0	27.8
5	LEPTO	water	4	0	0	27.8
5	LEPTO	water	5	0	0	27.8
5	LEPTO	water	6	0	0	27.8
5	LEPTO	water	7	0	0	27.8
6	LEPTO	water	8	1	2	23
6	LEPTO	water	9	0	0	23
6	LEPTO	water	10	0.5	1	23
6	LEPTO	water	11	0	0	23
6	LEPTO	water	12	0	0	23
6	LEPTO	water	1	0	0	23
6	LEPTO	water	2	0	0	23
6	LEPTO	water	3	0	0	23
6	LEPTO	water	4	0	0	23
6	LEPTO	water	5	0	0	23
6	LEPTO	water	6	0	0	23
6	LEPTO	water	7	0	0	23
7	LEPTO	water	8	0	0	19.5
7	LEPTO	water	9	0	0	19.5
7	LEPTO	water	10	0	0	19.5
7	LEPTO	water	11	0	0	19.5
7	LEPTO	water	12	0	0	19.5
7	LEPTO	water	1	0	0	19.5
7	LEPTO	water	2	0	0	19.5
7	LEPTO	water	3	0	0	19.5
7	LEPTO	water	4	0	0	19.5
7	LEPTO	water	5	0	0	19.5
7	LEPTO	water	6	0	0	19.5
7	LEPTO	water	7	0	0	19.5
8	LEPTO	water	8	0	0	28.7
8	LEPTO	water	9	0	0	28.7
8	LEPTO	water	10	0	0	28.7
8	LEPTO	water	11	0	0	28.7
8	LEPTO	water	12	0	0	28.7
8	LEPTO	water	1	0	0	28.7
8	LEPTO	water	2	0	0	28.7
8	LEPTO	water	3	0	0	28.7
8	LEPTO	water	4	0	0	28.7
8	LEPTO	water	5	0	0	28.7
8	LEPTO	water	6	0	0	28.7
8	LEPTO	water	7	0	0	28.7
1	LEPTO	glucose	8	0	0	27.1
1	LEPTO	glucose	9	0	0	27.1
1	LEPTO	glucose	10	0.5	1	27.1
1	LEPTO	glucose	11	0	0	27.1
1	LEPTO	glucose	12	0	0	27.1
1	LEPTO	glucose	1	0	0	27.1
1	LEPTO	glucose	2	0.5	1	27.1
1	LEPTO	glucose	3	0	0	27.1
1	LEPTO	glucose	4	0	0	27.1
1	LEPTO	glucose	5	0	0	27.1
1	LEPTO	glucose	6	0	0	27.1
1	LEPTO	glucose	7	0	0	27.1
4	LEPTO	glucose	8	0	0	26.8
4	LEPTO	glucose	9	0	0	26.8
4	LEPTO	glucose	10	0	0	26.8
4	LEPTO	glucose	11	0	0	26.8
4	LEPTO	glucose	12	0	0	26.8
4	LEPTO	glucose	1	0	0	26.8
4	LEPTO	glucose	2	0	0	26.8
4	LEPTO	glucose	3	0	0	26.8
4	LEPTO	glucose	4	0	0	26.8
4	LEPTO	glucose	5	0	0	26.8
4	LEPTO	glucose	6	0	0	26.8
4	LEPTO	glucose	7	0	0	26.8
5	LEPTO	glucose	8	1.5	3	27.8
5	LEPTO	glucose	9	11.5	23	27.8
5	LEPTO	glucose	10	9.5	19	27.8
5	LEPTO	glucose	11	0.5	1	27.8
5	LEPTO	glucose	12	0.5	1	27.8
5	LEPTO	glucose	1	0	0	27.8
5	LEPTO	glucose	2	0	0	27.8
5	LEPTO	glucose	3	0	0	27.8
5	LEPTO	glucose	4	0	0	27.8
5	LEPTO	glucose	5	0	0	27.8
5	LEPTO	glucose	6	0	0	27.8
5	LEPTO	glucose	7	0	0	27.8
6	LEPTO	glucose	8	1.5	3	23
6	LEPTO	glucose	9	0	0	23
6	LEPTO	glucose	10	0	0	23
6	LEPTO	glucose	11	0	0	23
6	LEPTO	glucose	12	0	0	23
6	LEPTO	glucose	1	0	0	23
6	LEPTO	glucose	2	0	0	23
6	LEPTO	glucose	3	0	0	23
6	LEPTO	glucose	4	0	0	23
6	LEPTO	glucose	5	0	0	23
6	LEPTO	glucose	6	0	0	23
6	LEPTO	glucose	7	0	0	23
7	LEPTO	glucose	8	0	0	19.5
7	LEPTO	glucose	9	0	0	19.5
7	LEPTO	glucose	10	0	0	19.5
7	LEPTO	glucose	11	0	0	19.5
7	LEPTO	glucose	12	0	0	19.5
7	LEPTO	glucose	1	1	2	19.5
7	LEPTO	glucose	2	5	10	19.5
7	LEPTO	glucose	3	4	8	19.5
7	LEPTO	glucose	4	3.5	7	19.5
7	LEPTO	glucose	5	1	2	19.5
7	LEPTO	glucose	6	0	0	19.5
7	LEPTO	glucose	7	0	0	19.5
8	LEPTO	glucose	8	0	0	28.7
8	LEPTO	glucose	9	0	0	28.7
8	LEPTO	glucose	10	0	0	28.7
8	LEPTO	glucose	11	0	0	28.7
8	LEPTO	glucose	12	0	0	28.7
8	LEPTO	glucose	1	0	0	28.7
8	LEPTO	glucose	2	0	0	28.7
8	LEPTO	glucose	3	0	0	28.7
8	LEPTO	glucose	4	0	0	28.7
8	LEPTO	glucose	5	0.5	1	28.7
8	LEPTO	glucose	6	0.5	1	28.7
8	LEPTO	glucose	7	0	0	28.7
1	LEPTO	fructose	8	0	0	27.1
1	LEPTO	fructose	9	0	0	27.1
1	LEPTO	fructose	10	8	16	27.1
1	LEPTO	fructose	11	3	6	27.1
1	LEPTO	fructose	12	0	0	27.1
1	LEPTO	fructose	1	0	0	27.1
1	LEPTO	fructose	2	0	0	27.1
1	LEPTO	fructose	3	1.5	3	27.1
1	LEPTO	fructose	4	0	0	27.1
1	LEPTO	fructose	5	0	0	27.1
1	LEPTO	fructose	6	0	0	27.1
1	LEPTO	fructose	7	0	0	27.1
4	LEPTO	fructose	8	0	0	26.8
4	LEPTO	fructose	9	0	0	26.8
4	LEPTO	fructose	10	0	0	26.8
4	LEPTO	fructose	11	0	0	26.8
4	LEPTO	fructose	12	0	0	26.8
4	LEPTO	fructose	1	0	0	26.8
4	LEPTO	fructose	2	0	0	26.8
4	LEPTO	fructose	3	0	0	26.8
4	LEPTO	fructose	4	0	0	26.8
4	LEPTO	fructose	5	0	0	26.8
4	LEPTO	fructose	6	0	0	26.8
4	LEPTO	fructose	7	0	0	26.8
5	LEPTO	fructose	8	0	0	27.8
5	LEPTO	fructose	9	0	0	27.8
5	LEPTO	fructose	10	0.5	1	27.8
5	LEPTO	fructose	11	6.5	13	27.8
5	LEPTO	fructose	12	3	6	27.8
5	LEPTO	fructose	1	1.5	3	27.8
5	LEPTO	fructose	2	4	8	27.8
5	LEPTO	fructose	3	0.5	1	27.8
5	LEPTO	fructose	4	0	0	27.8
5	LEPTO	fructose	5	0	0	27.8
5	LEPTO	fructose	6	0	0	27.8
5	LEPTO	fructose	7	0	0	27.8
6	LEPTO	fructose	8	1	2	23
6	LEPTO	fructose	9	1	2	23
6	LEPTO	fructose	10	0	0	23
6	LEPTO	fructose	11	0	0	23
6	LEPTO	fructose	12	0	0	23
6	LEPTO	fructose	1	0	0	23
6	LEPTO	fructose	2	0	0	23
6	LEPTO	fructose	3	0	0	23
6	LEPTO	fructose	4	0	0	23
6	LEPTO	fructose	5	0	0	23
6	LEPTO	fructose	6	0	0	23
6	LEPTO	fructose	7	0	0	23
7	LEPTO	fructose	8	0	0	19.5
7	LEPTO	fructose	9	0	0	19.5
7	LEPTO	fructose	10	0	0	19.5
7	LEPTO	fructose	11	0	0	19.5
7	LEPTO	fructose	12	0	0	19.5
7	LEPTO	fructose	1	3.5	7	19.5
7	LEPTO	fructose	2	0	0	19.5
7	LEPTO	fructose	3	0	0	19.5
7	LEPTO	fructose	4	0	0	19.5
7	LEPTO	fructose	5	1	2	19.5
7	LEPTO	fructose	6	0	0	19.5
7	LEPTO	fructose	7	0	0	19.5
8	LEPTO	fructose	8	0	0	28.7
8	LEPTO	fructose	9	0	0	28.7
8	LEPTO	fructose	10	0	0	28.7
8	LEPTO	fructose	11	0	0	28.7
8	LEPTO	fructose	12	0	0	28.7
8	LEPTO	fructose	1	0	0	28.7
8	LEPTO	fructose	2	0	0	28.7
8	LEPTO	fructose	3	0	0	28.7
8	LEPTO	fructose	4	0	0	28.7
8	LEPTO	fructose	5	0.5	1	28.7
8	LEPTO	fructose	6	0	0	28.7
8	LEPTO	fructose	7	0	0	28.7
1	LEPTO	sucrose	8	0	0	27.1
1	LEPTO	sucrose	9	0	0	27.1
1	LEPTO	sucrose	10	2	4	27.1
1	LEPTO	sucrose	11	1	2	27.1
1	LEPTO	sucrose	12	0	0	27.1
1	LEPTO	sucrose	1	0	0	27.1
1	LEPTO	sucrose	2	0	0	27.1
1	LEPTO	sucrose	3	0	0	27.1
1	LEPTO	sucrose	4	0	0	27.1
1	LEPTO	sucrose	5	0	0	27.1
1	LEPTO	sucrose	6	0	0	27.1
1	LEPTO	sucrose	7	0	0	27.1
4	LEPTO	sucrose	8	0	0	26.8
4	LEPTO	sucrose	9	0	0	26.8
4	LEPTO	sucrose	10	0	0	26.8
4	LEPTO	sucrose	11	0	0	26.8
4	LEPTO	sucrose	12	0	0	26.8
4	LEPTO	sucrose	1	0	0	26.8
4	LEPTO	sucrose	2	0	0	26.8
4	LEPTO	sucrose	3	0	0	26.8
4	LEPTO	sucrose	4	0	0	26.8
4	LEPTO	sucrose	5	0	0	26.8
4	LEPTO	sucrose	6	0	0	26.8
4	LEPTO	sucrose	7	0	0	26.8
5	LEPTO	sucrose	8	0	0	27.8
5	LEPTO	sucrose	9	0	0	27.8
5	LEPTO	sucrose	10	0.5	1	27.8
5	LEPTO	sucrose	11	2.5	5	27.8
5	LEPTO	sucrose	12	2.5	5	27.8
5	LEPTO	sucrose	1	0	0	27.8
5	LEPTO	sucrose	2	0.5	1	27.8
5	LEPTO	sucrose	3	0	0	27.8
5	LEPTO	sucrose	4	0	0	27.8
5	LEPTO	sucrose	5	0	0	27.8
5	LEPTO	sucrose	6	1.5	3	27.8
5	LEPTO	sucrose	7	0	0	27.8
6	LEPTO	sucrose	8	1	2	23
6	LEPTO	sucrose	9	0.5	1	23
6	LEPTO	sucrose	10	0.5	1	23
6	LEPTO	sucrose	11	0	0	23
6	LEPTO	sucrose	12	0	0	23
6	LEPTO	sucrose	1	0	0	23
6	LEPTO	sucrose	2	1	2	23
6	LEPTO	sucrose	3	0	0	23
6	LEPTO	sucrose	4	0	0	23
6	LEPTO	sucrose	5	0	0	23
6	LEPTO	sucrose	6	0	0	23
6	LEPTO	sucrose	7	0	0	23
7	LEPTO	sucrose	8	0	0	19.5
7	LEPTO	sucrose	9	0	0	19.5
7	LEPTO	sucrose	10	0	0	19.5
7	LEPTO	sucrose	11	0	0	19.5
7	LEPTO	sucrose	12	0	0	19.5
7	LEPTO	sucrose	1	0	0	19.5
7	LEPTO	sucrose	2	0	0	19.5
7	LEPTO	sucrose	3	0	0	19.5
7	LEPTO	sucrose	4	0	0	19.5
7	LEPTO	sucrose	5	0	0	19.5
7	LEPTO	sucrose	6	0	0	19.5
7	LEPTO	sucrose	7	0	0	19.5
8	LEPTO	sucrose	8	0	0	28.7
8	LEPTO	sucrose	9	0	0	28.7
8	LEPTO	sucrose	10	0	0	28.7
8	LEPTO	sucrose	11	0	0	28.7
8	LEPTO	sucrose	12	0	0	28.7
8	LEPTO	sucrose	1	0	0	28.7
8	LEPTO	sucrose	2	0	0	28.7
8	LEPTO	sucrose	3	0	0	28.7
8	LEPTO	sucrose	4	0	0	28.7
8	LEPTO	sucrose	5	2	4	28.7
8	LEPTO	sucrose	6	0.5	1	28.7
8	LEPTO	sucrose	7	1	2	28.7
1	LEPTO	ceiba	8	0	0	27.1
1	LEPTO	ceiba	9	0	0	27.1
1	LEPTO	ceiba	10	0	0	27.1
1	LEPTO	ceiba	11	0	0	27.1
1	LEPTO	ceiba	12	0	0	27.1
1	LEPTO	ceiba	1	0	0	27.1
1	LEPTO	ceiba	2	0	0	27.1
1	LEPTO	ceiba	3	0	0	27.1
1	LEPTO	ceiba	4	0	0	27.1
1	LEPTO	ceiba	5	0	0	27.1
1	LEPTO	ceiba	6	0	0	27.1
1	LEPTO	ceiba	7	0	0	27.1
4	LEPTO	ceiba	8	0	0	26.8
4	LEPTO	ceiba	9	0	0	26.8
4	LEPTO	ceiba	10	0	0	26.8
4	LEPTO	ceiba	11	0	0	26.8
4	LEPTO	ceiba	12	0	0	26.8
4	LEPTO	ceiba	1	0	0	26.8
4	LEPTO	ceiba	2	0	0	26.8
4	LEPTO	ceiba	3	0	0	26.8
4	LEPTO	ceiba	4	0	0	26.8
4	LEPTO	ceiba	5	0	0	26.8
4	LEPTO	ceiba	6	0	0	26.8
4	LEPTO	ceiba	7	0	0	26.8
5	LEPTO	ceiba	8	0	0	27.8
5	LEPTO	ceiba	9	1	2	27.8
5	LEPTO	ceiba	10	0	0	27.8
5	LEPTO	ceiba	11	0	0	27.8
5	LEPTO	ceiba	12	0	0	27.8
5	LEPTO	ceiba	1	0	0	27.8
5	LEPTO	ceiba	2	0	0	27.8
5	LEPTO	ceiba	3	0	0	27.8
5	LEPTO	ceiba	4	0	0	27.8
5	LEPTO	ceiba	5	0	0	27.8
5	LEPTO	ceiba	6	0	0	27.8
5	LEPTO	ceiba	7	0	0	27.8
6	LEPTO	ceiba	8	0	0	23
6	LEPTO	ceiba	9	2	4	23
6	LEPTO	ceiba	10	0.5	1	23
6	LEPTO	ceiba	11	0	0	23
6	LEPTO	ceiba	12	0	0	23
6	LEPTO	ceiba	1	0	0	23
6	LEPTO	ceiba	2	0	0	23
6	LEPTO	ceiba	3	0.5	1	23
6	LEPTO	ceiba	4	0	0	23
6	LEPTO	ceiba	5	0	0	23
6	LEPTO	ceiba	6	0	0	23
6	LEPTO	ceiba	7	0	0	23
7	LEPTO	ceiba	8	0	0	19.5
7	LEPTO	ceiba	9	0	0	19.5
7	LEPTO	ceiba	10	0	0	19.5
7	LEPTO	ceiba	11	0	0	19.5
7	LEPTO	ceiba	12	0	0	19.5
7	LEPTO	ceiba	1	3	6	19.5
7	LEPTO	ceiba	2	0	0	19.5
7	LEPTO	ceiba	3	0	0	19.5
7	LEPTO	ceiba	4	0	0	19.5
7	LEPTO	ceiba	5	5	10	19.5
7	LEPTO	ceiba	6	0.5	1	19.5
7	LEPTO	ceiba	7	0	0	19.5
8	LEPTO	ceiba	8	0	0	28.7
8	LEPTO	ceiba	9	0	0	28.7
8	LEPTO	ceiba	10	0	0	28.7
8	LEPTO	ceiba	11	0	0	28.7
8	LEPTO	ceiba	12	0	0	28.7
8	LEPTO	ceiba	1	0	0	28.7
8	LEPTO	ceiba	2	0	0	28.7
8	LEPTO	ceiba	3	0	0	28.7
8	LEPTO	ceiba	4	0	0	28.7
8	LEPTO	ceiba	5	0	0	28.7
8	LEPTO	ceiba	6	0	0	28.7
8	LEPTO	ceiba	7	0	0	28.7
1	LEPTO	ipomoea	8	0	0	27.1
1	LEPTO	ipomoea	9	0	0	27.1
1	LEPTO	ipomoea	10	0	0	27.1
1	LEPTO	ipomoea	11	0	0	27.1
1	LEPTO	ipomoea	12	0	0	27.1
1	LEPTO	ipomoea	1	0	0	27.1
1	LEPTO	ipomoea	2	0	0	27.1
1	LEPTO	ipomoea	3	0	0	27.1
1	LEPTO	ipomoea	4	0	0	27.1
1	LEPTO	ipomoea	5	0	0	27.1
1	LEPTO	ipomoea	6	0	0	27.1
1	LEPTO	ipomoea	7	0	0	27.1
4	LEPTO	ipomoea	8	0	0	26.8
4	LEPTO	ipomoea	9	0	0	26.8
4	LEPTO	ipomoea	10	0	0	26.8
4	LEPTO	ipomoea	11	0	0	26.8
4	LEPTO	ipomoea	12	0	0	26.8
4	LEPTO	ipomoea	1	0	0	26.8
4	LEPTO	ipomoea	2	0	0	26.8
4	LEPTO	ipomoea	3	1	2	26.8
4	LEPTO	ipomoea	4	0	0	26.8
4	LEPTO	ipomoea	5	0	0	26.8
4	LEPTO	ipomoea	6	0	0	26.8
4	LEPTO	ipomoea	7	0	0	26.8
5	LEPTO	ipomoea	8	2	4	27.8
5	LEPTO	ipomoea	9	1	2	27.8
5	LEPTO	ipomoea	10	0	0	27.8
5	LEPTO	ipomoea	11	0	0	27.8
5	LEPTO	ipomoea	12	0	0	27.8
5	LEPTO	ipomoea	1	0	0	27.8
5	LEPTO	ipomoea	2	0	0	27.8
5	LEPTO	ipomoea	3	0	0	27.8
5	LEPTO	ipomoea	4	0	0	27.8
5	LEPTO	ipomoea	5	0	0	27.8
5	LEPTO	ipomoea	6	0	0	27.8
5	LEPTO	ipomoea	7	0.5	1	27.8
6	LEPTO	ipomoea	8	4.5	9	23
6	LEPTO	ipomoea	9	3.5	7	23
6	LEPTO	ipomoea	10	4	8	23
6	LEPTO	ipomoea	11	2	4	23
6	LEPTO	ipomoea	12	2	4	23
6	LEPTO	ipomoea	1	1.5	3	23
6	LEPTO	ipomoea	2	2.5	5	23
6	LEPTO	ipomoea	3	4	4	23
6	LEPTO	ipomoea	4	0	0	23
6	LEPTO	ipomoea	5	0	0	23
6	LEPTO	ipomoea	6	0.5	1	23
6	LEPTO	ipomoea	7	0	0	23
7	LEPTO	ipomoea	8	0	0	19.5
7	LEPTO	ipomoea	9	0	0	19.5
7	LEPTO	ipomoea	10	0	0	19.5
7	LEPTO	ipomoea	11	0	0	19.5
7	LEPTO	ipomoea	12	0	0	19.5
7	LEPTO	ipomoea	1	1	2	19.5
7	LEPTO	ipomoea	2	0	0	19.5
7	LEPTO	ipomoea	3	0	0	19.5
7	LEPTO	ipomoea	4	0	0	19.5
7	LEPTO	ipomoea	5	0	0	19.5
7	LEPTO	ipomoea	6	0	0	19.5
7	LEPTO	ipomoea	7	0	0	19.5
8	LEPTO	ipomoea	8	0	0	28.7
8	LEPTO	ipomoea	9	0	0	28.7
8	LEPTO	ipomoea	10	0	0	28.7
8	LEPTO	ipomoea	11	0	0	28.7
8	LEPTO	ipomoea	12	0	0	28.7
8	LEPTO	ipomoea	1	0	0	28.7
8	LEPTO	ipomoea	2	0	0	28.7
8	LEPTO	ipomoea	3	0	0	28.7
8	LEPTO	ipomoea	4	0	0	28.7
8	LEPTO	ipomoea	5	0.5	1	28.7
8	LEPTO	ipomoea	6	0	0	28.7
8	LEPTO	ipomoea	7	0	0	28.7
1	LEPTO	cacti	8	0	0	27.1
1	LEPTO	cacti	9	0	0	27.1
1	LEPTO	cacti	10	4.5	9	27.1
1	LEPTO	cacti	11	6.5	13	27.1
1	LEPTO	cacti	12	4.5	9	27.1
1	LEPTO	cacti	1	0	0	27.1
1	LEPTO	cacti	2	3	6	27.1
1	LEPTO	cacti	3	14	28	27.1
1	LEPTO	cacti	4	7	14	27.1
1	LEPTO	cacti	5	0	0	27.1
1	LEPTO	cacti	6	0	0	27.1
1	LEPTO	cacti	7	0	0	27.1
4	LEPTO	cacti	8	0	0	26.8
4	LEPTO	cacti	9	0	0	26.8
4	LEPTO	cacti	10	0	0	26.8
4	LEPTO	cacti	11	0	0	26.8
4	LEPTO	cacti	12	0	0	26.8
4	LEPTO	cacti	1	0	0	26.8
4	LEPTO	cacti	2	0	0	26.8
4	LEPTO	cacti	3	0	0	26.8
4	LEPTO	cacti	4	0	0	26.8
4	LEPTO	cacti	5	0	0	26.8
4	LEPTO	cacti	6	0	0	26.8
4	LEPTO	cacti	7	0	0	26.8
5	LEPTO	cacti	8	0	0	27.8
5	LEPTO	cacti	9	0	0	27.8
5	LEPTO	cacti	10	0	0	27.8
5	LEPTO	cacti	11	3	6	27.8
5	LEPTO	cacti	12	4.5	9	27.8
5	LEPTO	cacti	1	7.5	15	27.8
5	LEPTO	cacti	2	2.5	5	27.8
5	LEPTO	cacti	3	6	12	27.8
5	LEPTO	cacti	4	2.5	5	27.8
5	LEPTO	cacti	5	2.5	5	27.8
5	LEPTO	cacti	6	6	12	27.8
5	LEPTO	cacti	7	0	0	27.8
6	LEPTO	cacti	8	0	0	23
6	LEPTO	cacti	9	0.5	1	23
6	LEPTO	cacti	10	0	0	23
6	LEPTO	cacti	11	0	0	23
6	LEPTO	cacti	12	0.5	1	23
6	LEPTO	cacti	1	1.5	3	23
6	LEPTO	cacti	2	0	0	23
6	LEPTO	cacti	3	2.5	5	23
6	LEPTO	cacti	4	2	4	23
6	LEPTO	cacti	5	2	4	23
6	LEPTO	cacti	6	1	2	23
6	LEPTO	cacti	7	0	0	23
7	LEPTO	cacti	8	0	0	19.5
7	LEPTO	cacti	9	0	0	19.5
7	LEPTO	cacti	10	0	0	19.5
7	LEPTO	cacti	11	0	0	19.5
7	LEPTO	cacti	12	0	0	19.5
7	LEPTO	cacti	1	1	2	19.5
7	LEPTO	cacti	2	0	0	19.5
7	LEPTO	cacti	3	0	0	19.5
7	LEPTO	cacti	4	0	0	19.5
7	LEPTO	cacti	5	3	6	19.5
7	LEPTO	cacti	6	0.5	1	19.5
7	LEPTO	cacti	7	0	0	19.5
8	LEPTO	cacti	8	0	0	28.7
8	LEPTO	cacti	9	0	0	28.7
8	LEPTO	cacti	10	0	0	28.7
8	LEPTO	cacti	11	0	0	28.7
8	LEPTO	cacti	12	0	0	28.7
8	LEPTO	cacti	1	0	0	28.7
8	LEPTO	cacti	2	0	0	28.7
8	LEPTO	cacti	3	0	0	28.7
8	LEPTO	cacti	4	0	0	28.7
8	LEPTO	cacti	5	0	0	28.7
8	LEPTO	cacti	6	0	0	28.7
8	LEPTO	cacti	7	0	0	28.7
1	GLOSSO	water	8	0	0	10.3
1	GLOSSO	water	9	0	0	10.3
1	GLOSSO	water	10	0.5	1	10.3
1	GLOSSO	water	11	1	2	10.3
1	GLOSSO	water	12	0	0	10.3
1	GLOSSO	water	1	0	0	10.3
1	GLOSSO	water	2	0	0	10.3
1	GLOSSO	water	3	0.5	1	10.3
1	GLOSSO	water	4	0.5	1	10.3
1	GLOSSO	water	5	1	2	10.3
1	GLOSSO	water	6	0	0	10.3
1	GLOSSO	water	7	0	0	10.3
3	GLOSSO	water	8	0	0	13.1
3	GLOSSO	water	9	0	0	13.1
3	GLOSSO	water	10	0	0	13.1
3	GLOSSO	water	11	0	0	13.1
3	GLOSSO	water	12	1.5	3	13.1
3	GLOSSO	water	1	0	0	13.1
3	GLOSSO	water	2	0	0	13.1
3	GLOSSO	water	3	0	0	13.1
3	GLOSSO	water	4	0	0	13.1
3	GLOSSO	water	5	0	0	13.1
3	GLOSSO	water	6	0.5	1	13.1
3	GLOSSO	water	7	0	0	13.1
4	GLOSSO	water	8	0	0	10.2
4	GLOSSO	water	9	0	0	10.2
4	GLOSSO	water	10	0	0	10.2
4	GLOSSO	water	11	0	0	10.2
4	GLOSSO	water	12	0	0	10.2
4	GLOSSO	water	1	0	0	10.2
4	GLOSSO	water	2	0	0	10.2
4	GLOSSO	water	3	0	0	10.2
4	GLOSSO	water	4	0	0	10.2
4	GLOSSO	water	5	0	0	10.2
4	GLOSSO	water	6	0	0	10.2
4	GLOSSO	water	7	0	0	10.2
6	GLOSSO	water	8	0	0	10.2
6	GLOSSO	water	9	0	0	10.2
6	GLOSSO	water	10	0	0	10.2
6	GLOSSO	water	11	0	0	10.2
6	GLOSSO	water	12	0	0	10.2
6	GLOSSO	water	1	0	0	10.2
6	GLOSSO	water	2	0	0	10.2
6	GLOSSO	water	3	0	0	10.2
6	GLOSSO	water	4	0	0	10.2
6	GLOSSO	water	5	0	0	10.2
6	GLOSSO	water	6	0	0	10.2
6	GLOSSO	water	7	0	0	10.2
7	GLOSSO	water	8	0	0	9.6
7	GLOSSO	water	9	0	0	9.6
7	GLOSSO	water	10	1.5	3	9.6
7	GLOSSO	water	11	0	0	9.6
7	GLOSSO	water	12	1	2	9.6
7	GLOSSO	water	1	0.5	1	9.6
7	GLOSSO	water	2	2	4	9.6
7	GLOSSO	water	3	0.5	1	9.6
7	GLOSSO	water	4	0.5	1	9.6
7	GLOSSO	water	5	0	0	9.6
7	GLOSSO	water	6	1.5	3	9.6
7	GLOSSO	water	7	0	0	9.6
8	GLOSSO	water	8	0	0	8.3
8	GLOSSO	water	9	0	0	8.3
8	GLOSSO	water	10	0	0	8.3
8	GLOSSO	water	11	0	0	8.3
8	GLOSSO	water	12	0	0	8.3
8	GLOSSO	water	1	0	0	8.3
8	GLOSSO	water	2	0	0	8.3
8	GLOSSO	water	3	0	0	8.3
8	GLOSSO	water	4	0	0	8.3
8	GLOSSO	water	5	0	0	8.3
8	GLOSSO	water	6	0	0	8.3
8	GLOSSO	water	7	0	0	8.3
1	GLOSSO	glucose	8	0	0	10.3
1	GLOSSO	glucose	9	0	0	10.3
1	GLOSSO	glucose	10	3	6	10.3
1	GLOSSO	glucose	11	2	4	10.3
1	GLOSSO	glucose	12	0	0	10.3
1	GLOSSO	glucose	1	0.5	1	10.3
1	GLOSSO	glucose	2	0	0	10.3
1	GLOSSO	glucose	3	0	0	10.3
1	GLOSSO	glucose	4	0	0	10.3
1	GLOSSO	glucose	5	0	0	10.3
1	GLOSSO	glucose	6	0	0	10.3
1	GLOSSO	glucose	7	0	0	10.3
3	GLOSSO	glucose	8	0	0	13.1
3	GLOSSO	glucose	9	0	0	13.1
3	GLOSSO	glucose	10	0	0	13.1
3	GLOSSO	glucose	11	0	0	13.1
3	GLOSSO	glucose	12	0	0	13.1
3	GLOSSO	glucose	1	0	0	13.1
3	GLOSSO	glucose	2	0	0	13.1
3	GLOSSO	glucose	3	0	0	13.1
3	GLOSSO	glucose	4	0	0	13.1
3	GLOSSO	glucose	5	0	0	13.1
3	GLOSSO	glucose	6	0	0	13.1
3	GLOSSO	glucose	7	0	0	13.1
4	GLOSSO	glucose	8	0	0	10.2
4	GLOSSO	glucose	9	0	0	10.2
4	GLOSSO	glucose	10	0	0	10.2
4	GLOSSO	glucose	11	3.5	7	10.2
4	GLOSSO	glucose	12	9	18	10.2
4	GLOSSO	glucose	1	0	0	10.2
4	GLOSSO	glucose	2	0	0	10.2
4	GLOSSO	glucose	3	0.5	1	10.2
4	GLOSSO	glucose	4	0.5	1	10.2
4	GLOSSO	glucose	5	0.5	1	10.2
4	GLOSSO	glucose	6	1.6	3	10.2
4	GLOSSO	glucose	7	0.5	1	10.2
6	GLOSSO	glucose	8	0	0	10.2
6	GLOSSO	glucose	9	0	0	10.2
6	GLOSSO	glucose	10	0	0	10.2
6	GLOSSO	glucose	11	0	0	10.2
6	GLOSSO	glucose	12	0	0	10.2
6	GLOSSO	glucose	1	0	0	10.2
6	GLOSSO	glucose	2	0	0	10.2
6	GLOSSO	glucose	3	0	0	10.2
6	GLOSSO	glucose	4	0	0	10.2
6	GLOSSO	glucose	5	0	0	10.2
6	GLOSSO	glucose	6	0	0	10.2
6	GLOSSO	glucose	7	0	0	10.2
7	GLOSSO	glucose	8	0	0	9.6
7	GLOSSO	glucose	9	0	0	9.6
7	GLOSSO	glucose	10	0	0	9.6
7	GLOSSO	glucose	11	0	0	9.6
7	GLOSSO	glucose	12	0	0	9.6
7	GLOSSO	glucose	1	0	0	9.6
7	GLOSSO	glucose	2	0	0	9.6
7	GLOSSO	glucose	3	0	0	9.6
7	GLOSSO	glucose	4	0	0	9.6
7	GLOSSO	glucose	5	0	0	9.6
7	GLOSSO	glucose	6	0	0	9.6
7	GLOSSO	glucose	7	0	0	9.6
8	GLOSSO	glucose	8	0	0	8.3
8	GLOSSO	glucose	9	0	0	8.3
8	GLOSSO	glucose	10	0	0	8.3
8	GLOSSO	glucose	11	0	0	8.3
8	GLOSSO	glucose	12	0	0	8.3
8	GLOSSO	glucose	1	1	2	8.3
8	GLOSSO	glucose	2	1	2	8.3
8	GLOSSO	glucose	3	0	0	8.3
8	GLOSSO	glucose	4	0	0	8.3
8	GLOSSO	glucose	5	0	0	8.3
8	GLOSSO	glucose	6	0	0	8.3
8	GLOSSO	glucose	7	0	0	8.3
1	GLOSSO	fructose	8	0	0	10.3
1	GLOSSO	fructose	9	0	0	10.3
1	GLOSSO	fructose	10	0	0	10.3
1	GLOSSO	fructose	11	0	0	10.3
1	GLOSSO	fructose	12	0	0	10.3
1	GLOSSO	fructose	1	0	0	10.3
1	GLOSSO	fructose	2	0	0	10.3
1	GLOSSO	fructose	3	0	0	10.3
1	GLOSSO	fructose	4	0	0	10.3
1	GLOSSO	fructose	5	0	0	10.3
1	GLOSSO	fructose	6	0	0	10.3
1	GLOSSO	fructose	7	0	0	10.3
3	GLOSSO	fructose	8	0	0	13.1
3	GLOSSO	fructose	9	0.5	1	13.1
3	GLOSSO	fructose	10	5.5	11	13.1
3	GLOSSO	fructose	11	8.5	17	13.1
3	GLOSSO	fructose	12	6	12	13.1
3	GLOSSO	fructose	1	3	6	13.1
3	GLOSSO	fructose	2	1	2	13.1
3	GLOSSO	fructose	3	0.5	1	13.1
3	GLOSSO	fructose	4	0.5	1	13.1
3	GLOSSO	fructose	5	0	0	13.1
3	GLOSSO	fructose	6	0	0	13.1
3	GLOSSO	fructose	7	0	0	13.1
4	GLOSSO	fructose	8	0	0	10.2
4	GLOSSO	fructose	9	0	0	10.2
4	GLOSSO	fructose	10	0	0	10.2
4	GLOSSO	fructose	11	0	0	10.2
4	GLOSSO	fructose	12	0	0	10.2
4	GLOSSO	fructose	1	0	0	10.2
4	GLOSSO	fructose	2	0	0	10.2
4	GLOSSO	fructose	3	0	0	10.2
4	GLOSSO	fructose	4	0	0	10.2
4	GLOSSO	fructose	5	0	0	10.2
4	GLOSSO	fructose	6	0.5	1	10.2
4	GLOSSO	fructose	7	0	0	10.2
6	GLOSSO	fructose	8	0	0	10.2
6	GLOSSO	fructose	9	0	0	10.2
6	GLOSSO	fructose	10	0	0	10.2
6	GLOSSO	fructose	11	0	0	10.2
6	GLOSSO	fructose	12	0	0	10.2
6	GLOSSO	fructose	1	0	0	10.2
6	GLOSSO	fructose	2	0	0	10.2
6	GLOSSO	fructose	3	0	0	10.2
6	GLOSSO	fructose	4	0	0	10.2
6	GLOSSO	fructose	5	0	0	10.2
6	GLOSSO	fructose	6	4	8	10.2
6	GLOSSO	fructose	7	0	0	10.2
7	GLOSSO	fructose	8	0	0	9.6
7	GLOSSO	fructose	9	0	0	9.6
7	GLOSSO	fructose	10	1.5	3	9.6
7	GLOSSO	fructose	11	0	0	9.6
7	GLOSSO	fructose	12	0	0	9.6
7	GLOSSO	fructose	1	0	0	9.6
7	GLOSSO	fructose	2	0	0	9.6
7	GLOSSO	fructose	3	0	0	9.6
7	GLOSSO	fructose	4	0	0	9.6
7	GLOSSO	fructose	5	0	0	9.6
7	GLOSSO	fructose	6	0	0	9.6
7	GLOSSO	fructose	7	0	0	9.6
8	GLOSSO	fructose	8	0	0	8.3
8	GLOSSO	fructose	9	0	0	8.3
8	GLOSSO	fructose	10	0	0	8.3
8	GLOSSO	fructose	11	0	0	8.3
8	GLOSSO	fructose	12	0	0	8.3
8	GLOSSO	fructose	1	0	0	8.3
8	GLOSSO	fructose	2	0	0	8.3
8	GLOSSO	fructose	3	0	0	8.3
8	GLOSSO	fructose	4	0	0	8.3
8	GLOSSO	fructose	5	0	0	8.3
8	GLOSSO	fructose	6	0	0	8.3
8	GLOSSO	fructose	7	0	0	8.3
1	GLOSSO	sucrose	8	0	0	10.3
1	GLOSSO	sucrose	9	3.5	7	10.3
1	GLOSSO	sucrose	10	13	26	10.3
1	GLOSSO	sucrose	11	7	14	10.3
1	GLOSSO	sucrose	12	8	16	10.3
1	GLOSSO	sucrose	1	10	20	10.3
1	GLOSSO	sucrose	2	8	16	10.3
1	GLOSSO	sucrose	3	10.5	21	10.3
1	GLOSSO	sucrose	4	8.5	17	10.3
1	GLOSSO	sucrose	5	8.5	17	10.3
1	GLOSSO	sucrose	6	6.5	13	10.3
1	GLOSSO	sucrose	7	0	0	10.3
3	GLOSSO	sucrose	8	0	0	13.1
3	GLOSSO	sucrose	9	0	0	13.1
3	GLOSSO	sucrose	10	6.5	13	13.1
3	GLOSSO	sucrose	11	4	8	13.1
3	GLOSSO	sucrose	12	0.5	1	13.1
3	GLOSSO	sucrose	1	4.5	9	13.1
3	GLOSSO	sucrose	2	6	12	13.1
3	GLOSSO	sucrose	3	3	6	13.1
3	GLOSSO	sucrose	4	0.5	1	13.1
3	GLOSSO	sucrose	5	1	2	13.1
3	GLOSSO	sucrose	6	0	0	13.1
3	GLOSSO	sucrose	7	0	0	13.1
4	GLOSSO	sucrose	8	0	0	10.2
4	GLOSSO	sucrose	9	0	0	10.2
4	GLOSSO	sucrose	10	0	0	10.2
4	GLOSSO	sucrose	11	0	0	10.2
4	GLOSSO	sucrose	12	0	0	10.2
4	GLOSSO	sucrose	1	0	0	10.2
4	GLOSSO	sucrose	2	0	0	10.2
4	GLOSSO	sucrose	3	0	0	10.2
4	GLOSSO	sucrose	4	0	0	10.2
4	GLOSSO	sucrose	5	0	0	10.2
4	GLOSSO	sucrose	6	0	0	10.2
4	GLOSSO	sucrose	7	0	0	10.2
6	GLOSSO	sucrose	8	0	0	10.2
6	GLOSSO	sucrose	9	0	0	10.2
6	GLOSSO	sucrose	10	0	0	10.2
6	GLOSSO	sucrose	11	0	0	10.2
6	GLOSSO	sucrose	12	0	0	10.2
6	GLOSSO	sucrose	1	0	0	10.2
6	GLOSSO	sucrose	2	0	0	10.2
6	GLOSSO	sucrose	3	0	0	10.2
6	GLOSSO	sucrose	4	0	0	10.2
6	GLOSSO	sucrose	5	0	0	10.2
6	GLOSSO	sucrose	6	0	0	10.2
6	GLOSSO	sucrose	7	0.5	1	10.2
7	GLOSSO	sucrose	8	0	0	9.6
7	GLOSSO	sucrose	9	0	0	9.6
7	GLOSSO	sucrose	10	0	0	9.6
7	GLOSSO	sucrose	11	0	0	9.6
7	GLOSSO	sucrose	12	0	0	9.6
7	GLOSSO	sucrose	1	0	0	9.6
7	GLOSSO	sucrose	2	0	0	9.6
7	GLOSSO	sucrose	3	0.5	1	9.6
7	GLOSSO	sucrose	4	0	0	9.6
7	GLOSSO	sucrose	5	0	0	9.6
7	GLOSSO	sucrose	6	0	0	9.6
7	GLOSSO	sucrose	7	0	0	9.6
8	GLOSSO	sucrose	8	0	0	8.3
8	GLOSSO	sucrose	9	0	0	8.3
8	GLOSSO	sucrose	10	0	0	8.3
8	GLOSSO	sucrose	11	0	0	8.3
8	GLOSSO	sucrose	12	0	0	8.3
8	GLOSSO	sucrose	1	0	0	8.3
8	GLOSSO	sucrose	2	0	0	8.3
8	GLOSSO	sucrose	3	0	0	8.3
8	GLOSSO	sucrose	4	0	0	8.3
8	GLOSSO	sucrose	5	0	0	8.3
8	GLOSSO	sucrose	6	0	0	8.3
8	GLOSSO	sucrose	7	0	0	8.3
1	GLOSSO	ceiba	8	0	0	10.3
1	GLOSSO	ceiba	9	0	0	10.3
1	GLOSSO	ceiba	10	0	0	10.3
1	GLOSSO	ceiba	11	0	0	10.3
1	GLOSSO	ceiba	12	0	0	10.3
1	GLOSSO	ceiba	1	0	0	10.3
1	GLOSSO	ceiba	2	0	0	10.3
1	GLOSSO	ceiba	3	0	0	10.3
1	GLOSSO	ceiba	4	0	0	10.3
1	GLOSSO	ceiba	5	0	0	10.3
1	GLOSSO	ceiba	6	0	0	10.3
1	GLOSSO	ceiba	7	0	0	10.3
3	GLOSSO	ceiba	8	0	0	13.1
3	GLOSSO	ceiba	9	0	0	13.1
3	GLOSSO	ceiba	10	1	2	13.1
3	GLOSSO	ceiba	11	0	0	13.1
3	GLOSSO	ceiba	12	0	0	13.1
3	GLOSSO	ceiba	1	0	0	13.1
3	GLOSSO	ceiba	2	0	0	13.1
3	GLOSSO	ceiba	3	0	0	13.1
3	GLOSSO	ceiba	4	0	0	13.1
3	GLOSSO	ceiba	5	0	0	13.1
3	GLOSSO	ceiba	6	0	0	13.1
3	GLOSSO	ceiba	7	0	0	13.1
4	GLOSSO	ceiba	8	0	0	10.2
4	GLOSSO	ceiba	9	0	0	10.2
4	GLOSSO	ceiba	10	0	0	10.2
4	GLOSSO	ceiba	11	0	0	10.2
4	GLOSSO	ceiba	12	0	0	10.2
4	GLOSSO	ceiba	1	0	0	10.2
4	GLOSSO	ceiba	2	0	0	10.2
4	GLOSSO	ceiba	3	0	0	10.2
4	GLOSSO	ceiba	4	1	2	10.2
4	GLOSSO	ceiba	5	0	0	10.2
4	GLOSSO	ceiba	6	0	0	10.2
4	GLOSSO	ceiba	7	0	0	10.2
6	GLOSSO	ceiba	8	0	0	10.2
6	GLOSSO	ceiba	9	0	0	10.2
6	GLOSSO	ceiba	10	0	0	10.2
6	GLOSSO	ceiba	11	0	0	10.2
6	GLOSSO	ceiba	12	5	10	10.2
6	GLOSSO	ceiba	1	0	0	10.2
6	GLOSSO	ceiba	2	0	0	10.2
6	GLOSSO	ceiba	3	0	0	10.2
6	GLOSSO	ceiba	4	0	0	10.2
6	GLOSSO	ceiba	5	0	0	10.2
6	GLOSSO	ceiba	6	0	0	10.2
6	GLOSSO	ceiba	7	0	0	10.2
7	GLOSSO	ceiba	8	0	0	9.6
7	GLOSSO	ceiba	9	0	0	9.6
7	GLOSSO	ceiba	10	0.5	1	9.6
7	GLOSSO	ceiba	11	0	0	9.6
7	GLOSSO	ceiba	12	0	0	9.6
7	GLOSSO	ceiba	1	0	0	9.6
7	GLOSSO	ceiba	2	0	0	9.6
7	GLOSSO	ceiba	3	1	2	9.6
7	GLOSSO	ceiba	4	0	0	9.6
7	GLOSSO	ceiba	5	1	2	9.6
7	GLOSSO	ceiba	6	0	0	9.6
7	GLOSSO	ceiba	7	0	0	9.6
8	GLOSSO	ceiba	8	0	0	8.3
8	GLOSSO	ceiba	9	0	0	8.3
8	GLOSSO	ceiba	10	0	0	8.3
8	GLOSSO	ceiba	11	0	0	8.3
8	GLOSSO	ceiba	12	0	0	8.3
8	GLOSSO	ceiba	1	0	0	8.3
8	GLOSSO	ceiba	2	0	0	8.3
8	GLOSSO	ceiba	3	0	0	8.3
8	GLOSSO	ceiba	4	0	0	8.3
8	GLOSSO	ceiba	5	0	0	8.3
8	GLOSSO	ceiba	6	0	0	8.3
8	GLOSSO	ceiba	7	0	0	8.3
1	GLOSSO	ipomoea	8	0	0	10.3
1	GLOSSO	ipomoea	9	4.5	9	10.3
1	GLOSSO	ipomoea	10	0	0	10.3
1	GLOSSO	ipomoea	11	0	0	10.3
1	GLOSSO	ipomoea	12	0	0	10.3
1	GLOSSO	ipomoea	1	0	0	10.3
1	GLOSSO	ipomoea	2	0	0	10.3
1	GLOSSO	ipomoea	3	0	0	10.3
1	GLOSSO	ipomoea	4	0	0	10.3
1	GLOSSO	ipomoea	5	0	0	10.3
1	GLOSSO	ipomoea	6	0	0	10.3
1	GLOSSO	ipomoea	7	0	0	10.3
3	GLOSSO	ipomoea	8	0	0	13.1
3	GLOSSO	ipomoea	9	0	0	13.1
3	GLOSSO	ipomoea	10	1	2	13.1
3	GLOSSO	ipomoea	11	3.5	7	13.1
3	GLOSSO	ipomoea	12	0	0	13.1
3	GLOSSO	ipomoea	1	2.5	5	13.1
3	GLOSSO	ipomoea	2	1.5	3	13.1
3	GLOSSO	ipomoea	3	0	0	13.1
3	GLOSSO	ipomoea	4	0.5	1	13.1
3	GLOSSO	ipomoea	5	0.5	1	13.1
3	GLOSSO	ipomoea	6	0	0	13.1
3	GLOSSO	ipomoea	7	0	0	13.1
4	GLOSSO	ipomoea	8	0	0	10.2
4	GLOSSO	ipomoea	9	0	0	10.2
4	GLOSSO	ipomoea	10	0	0	10.2
4	GLOSSO	ipomoea	11	0	0	10.2
4	GLOSSO	ipomoea	12	2	4	10.2
4	GLOSSO	ipomoea	1	8	16	10.2
4	GLOSSO	ipomoea	2	11	22	10.2
4	GLOSSO	ipomoea	3	11.5	23	10.2
4	GLOSSO	ipomoea	4	9.5	19	10.2
4	GLOSSO	ipomoea	5	13.5	27	10.2
4	GLOSSO	ipomoea	6	12	24	10.2
4	GLOSSO	ipomoea	7	4.5	9	10.2
6	GLOSSO	ipomoea	8	0	0	10.2
6	GLOSSO	ipomoea	9	0	0	10.2
6	GLOSSO	ipomoea	10	0	0	10.2
6	GLOSSO	ipomoea	11	0	0	10.2
6	GLOSSO	ipomoea	12	9.5	19	10.2
6	GLOSSO	ipomoea	1	1.5	3	10.2
6	GLOSSO	ipomoea	2	0	0	10.2
6	GLOSSO	ipomoea	3	0	0	10.2
6	GLOSSO	ipomoea	4	0	0	10.2
6	GLOSSO	ipomoea	5	0	0	10.2
6	GLOSSO	ipomoea	6	0	0	10.2
6	GLOSSO	ipomoea	7	0.5	1	10.2
7	GLOSSO	ipomoea	8	0	0	9.6
7	GLOSSO	ipomoea	9	0	0	9.6
7	GLOSSO	ipomoea	10	0.5	1	9.6
7	GLOSSO	ipomoea	11	0	0	9.6
7	GLOSSO	ipomoea	12	0	0	9.6
7	GLOSSO	ipomoea	1	0	0	9.6
7	GLOSSO	ipomoea	2	0	0	9.6
7	GLOSSO	ipomoea	3	0	0	9.6
7	GLOSSO	ipomoea	4	0	0	9.6
7	GLOSSO	ipomoea	5	0	0	9.6
7	GLOSSO	ipomoea	6	0	0	9.6
7	GLOSSO	ipomoea	7	0	0	9.6
8	GLOSSO	ipomoea	8	0	0	8.3
8	GLOSSO	ipomoea	9	0	0	8.3
8	GLOSSO	ipomoea	10	0	0	8.3
8	GLOSSO	ipomoea	11	0	0	8.3
8	GLOSSO	ipomoea	12	0	0	8.3
8	GLOSSO	ipomoea	1	0	0	8.3
8	GLOSSO	ipomoea	2	0	0	8.3
8	GLOSSO	ipomoea	3	0	0	8.3
8	GLOSSO	ipomoea	4	0	0	8.3
8	GLOSSO	ipomoea	5	0	0	8.3
8	GLOSSO	ipomoea	6	0	0	8.3
8	GLOSSO	ipomoea	7	0	0	8.3
1	GLOSSO	cacti	8	0	0	10.3
1	GLOSSO	cacti	9	0	0	10.3
1	GLOSSO	cacti	10	0	0	10.3
1	GLOSSO	cacti	11	0	0	10.3
1	GLOSSO	cacti	12	0	0	10.3
1	GLOSSO	cacti	1	0	0	10.3
1	GLOSSO	cacti	2	0	0	10.3
1	GLOSSO	cacti	3	0	0	10.3
1	GLOSSO	cacti	4	0	0	10.3
1	GLOSSO	cacti	5	0	0	10.3
1	GLOSSO	cacti	6	0	0	10.3
1	GLOSSO	cacti	7	0	0	10.3
3	GLOSSO	cacti	8	0	0	13.1
3	GLOSSO	cacti	9	0	0	13.1
3	GLOSSO	cacti	10	0	0	13.1
3	GLOSSO	cacti	11	1.5	3	13.1
3	GLOSSO	cacti	12	3.5	7	13.1
3	GLOSSO	cacti	1	0.5	1	13.1
3	GLOSSO	cacti	2	0	0	13.1
3	GLOSSO	cacti	3	2	4	13.1
3	GLOSSO	cacti	4	0.5	1	13.1
3	GLOSSO	cacti	5	0.5	1	13.1
3	GLOSSO	cacti	6	0	0	13.1
3	GLOSSO	cacti	7	0	0	13.1
4	GLOSSO	cacti	8	0	0	10.2
4	GLOSSO	cacti	9	0	0	10.2
4	GLOSSO	cacti	10	0	0	10.2
4	GLOSSO	cacti	11	0.5	1	10.2
4	GLOSSO	cacti	12	0.5	1	10.2
4	GLOSSO	cacti	1	0	0	10.2
4	GLOSSO	cacti	2	0	0	10.2
4	GLOSSO	cacti	3	0	0	10.2
4	GLOSSO	cacti	4	0	0	10.2
4	GLOSSO	cacti	5	0	0	10.2
4	GLOSSO	cacti	6	0	0	10.2
4	GLOSSO	cacti	7	0	0	10.2
6	GLOSSO	cacti	8	0	0	10.2
6	GLOSSO	cacti	9	0	0	10.2
6	GLOSSO	cacti	10	0	0	10.2
6	GLOSSO	cacti	11	0	0	10.2
6	GLOSSO	cacti	12	0	0	10.2
6	GLOSSO	cacti	1	0	0	10.2
6	GLOSSO	cacti	2	0	0	10.2
6	GLOSSO	cacti	3	0	0	10.2
6	GLOSSO	cacti	4	0	0	10.2
6	GLOSSO	cacti	5	0	0	10.2
6	GLOSSO	cacti	6	0	0	10.2
6	GLOSSO	cacti	7	0	0	10.2
7	GLOSSO	cacti	8	0	0	9.6
7	GLOSSO	cacti	9	0	0	9.6
7	GLOSSO	cacti	10	0.5	1	9.6
7	GLOSSO	cacti	11	0	0	9.6
7	GLOSSO	cacti	12	0	0	9.6
7	GLOSSO	cacti	1	0	0	9.6
7	GLOSSO	cacti	2	0	0	9.6
7	GLOSSO	cacti	3	0	0	9.6
7	GLOSSO	cacti	4	0	0	9.6
7	GLOSSO	cacti	5	0	0	9.6
7	GLOSSO	cacti	6	0	0	9.6
7	GLOSSO	cacti	7	0	0	9.6
8	GLOSSO	cacti	8	0	0	8.3
8	GLOSSO	cacti	9	0	0	8.3
8	GLOSSO	cacti	10	0	0	8.3
8	GLOSSO	cacti	11	0	0	8.3
8	GLOSSO	cacti	12	6.5	13	8.3
8	GLOSSO	cacti	1	0.5	1	8.3
8	GLOSSO	cacti	2	0	0	8.3
8	GLOSSO	cacti	3	0.5	1	8.3
8	GLOSSO	cacti	4	1	2	8.3
8	GLOSSO	cacti	5	0.5	1	8.3
8	GLOSSO	cacti	6	0	0	8.3
8	GLOSSO	cacti	7	0	0	8.3
